# Supplementary material for: Systematic mapping of chemoreceptor specificities for Pseudomonas aeruginosa
Source: PubMed Central journal article supplement (PMC10653921; doi:10.1128/mbio.02099-23), 2023-10-04
Supplement: mbio.02099-23-s0001.pdf [file mbio.02099-23-s0001.pdf]

1  
2  
3  
4  
5  
6  
7  
8  
9  
10  
11  
12  
13  
14  
15  
16  
17  
18  
19  
20  
21  
22

**Supplemental material**

to

**Systematic mapping of chemoreceptor specificities for *Pseudomonas aeruginosa***

by

Wenhao Xu, Jean Paul Cerna-Vargas, Ana Tajuelo, Andrea Lozano-Montoya, Melissa Kivoloka,  
Nicolas Krink, Elizabet Monteagudo-Cascales, Miguel A. Matilla, Tino Krell, Victor Sourjik

A

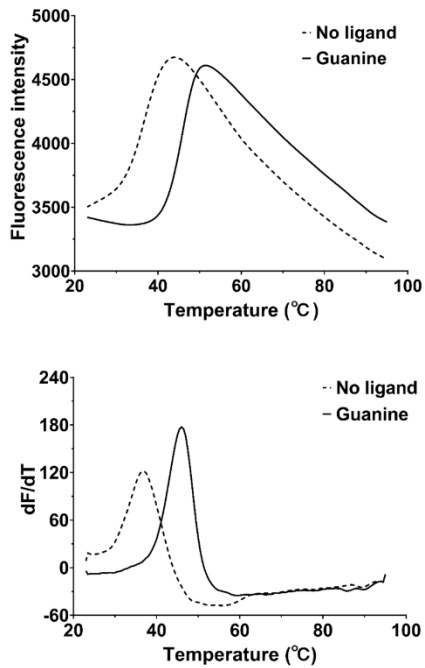

B

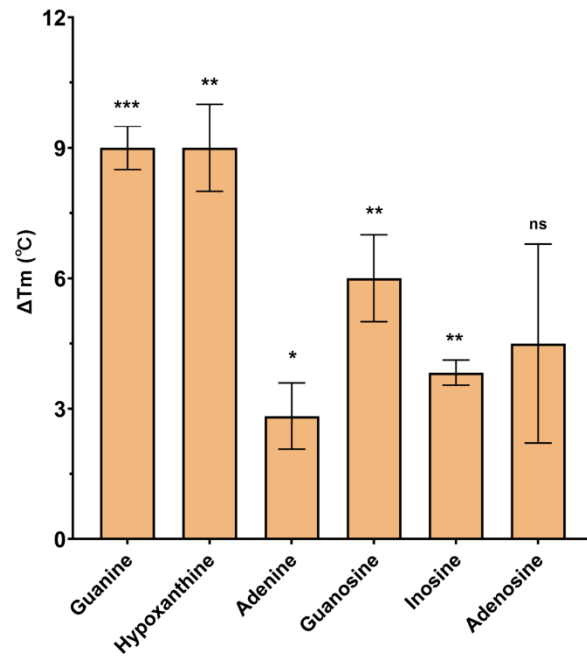

23

24 **Fig. S1 Thermal shift assay for purified PctP-LBD in the presence of purine derivatives.** (A) Thermal unfolding  
 25 of PctP-LBD in the absence or in the presence of 2 mM guanine (upper panel: raw data; lower panel: their first  
 26 derivative). (B) Increases in the midpoint temperature of protein unfolding transition ( $T_m$ ) induced by indicated ligands.  
 27 Data shown are the means and standard deviations from three biological replicates conducted in triplicate. Significance  
 28 of difference from zero (no thermal shift), assessed by one sample *t*-test, is indicated by asterisks (ns: non-significant,  
 29 \* $p \leq 0.05$ , \*\* $p \leq 0.01$ , \*\*\* $p \leq 0.001$ ).

30

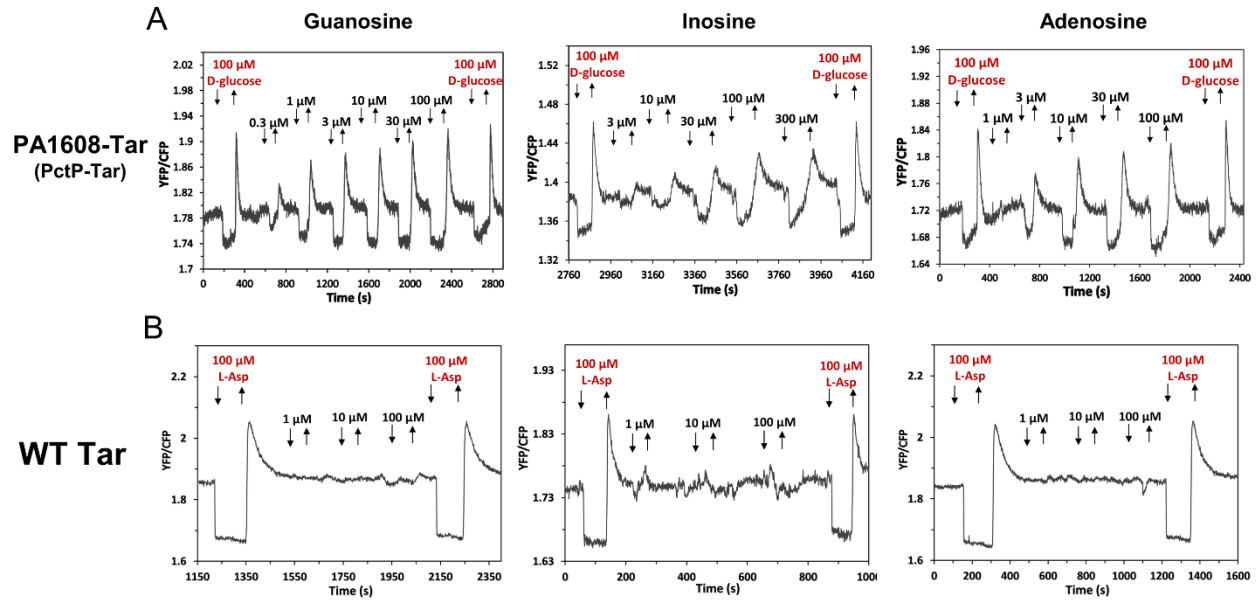

31

32 **Fig. S2 PctP-Tar hybrid mediates specific FRET responses to purine nucleosides.** FRET measurements for *E. coli*  
 33 cells expressing PctP-Tar hybrid (A) or Tar (B) as a sole receptor, responding to the indicated concentrations of  
 34 guanosine, inosine or adenosine. The activity of PctP-Tar was confirmed using D-glucose. Similarly, L-aspartate (L-  
 35 Asp) was used as a positive ligand for Tar.

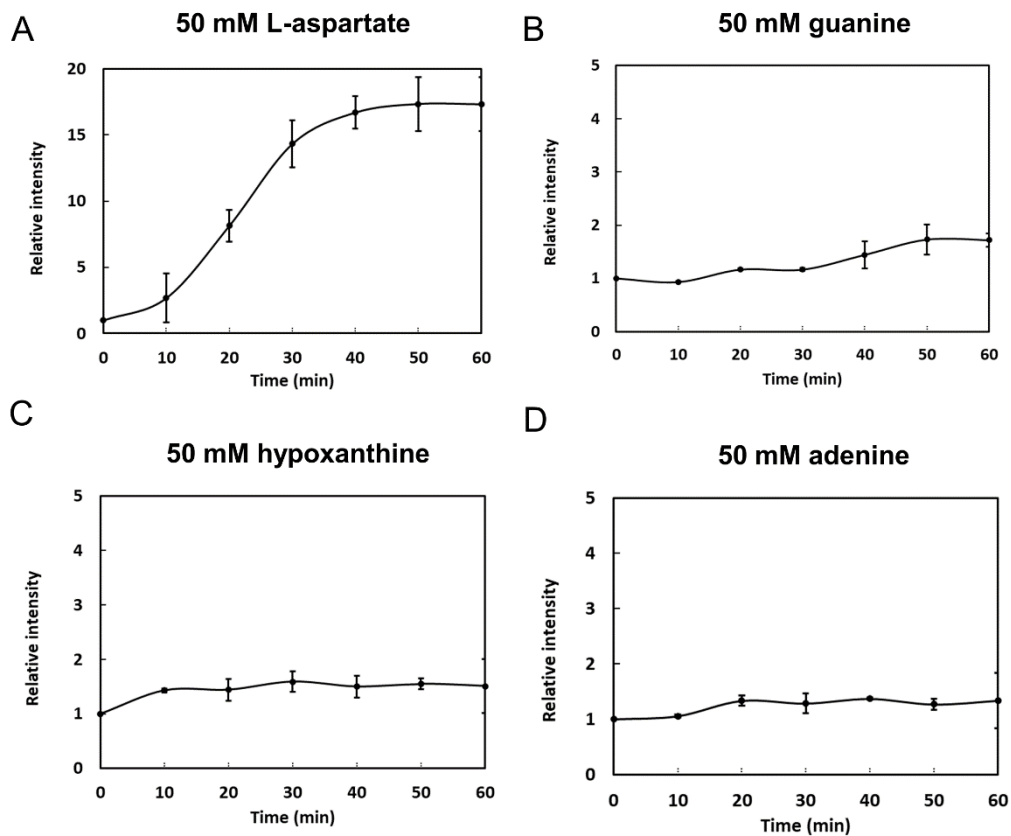

36

37 **Fig. S3 Control microfluidic assays for responses of *E. coli* expressing Tar to purines.** Experiments were  
 38 performed as in Fig. 4C, with L-Asp used as a positive control for Tar.

39

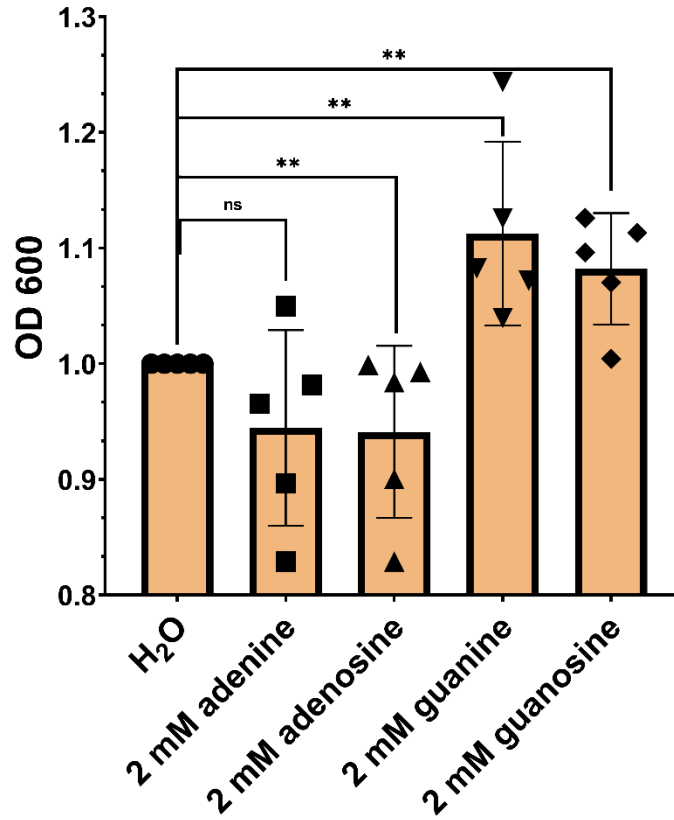

40

41 **Fig. S4 Effects of purine derivatives on the growth of *P. aeruginosa* PAO1.** PAO1 was cultured at 37°C in LB  
 42 containing 2 mM of the indicated compounds, and the same volume of H<sub>2</sub>O was added to the culture as control. Optical  
 43 density of cultures was measured at 600 nm after growing 12 hours with shaking in the microplate reader. For each  
 44 experiment, the OD<sub>600</sub> was normalized to the OD<sub>600</sub> of the control culture in LB. The means and standard deviations  
 45 of five biological replicates each conducted in triplicate were shown. Error bars indicated the mean ± standard  
 46 deviations. Significance of differences, assessed using a paired *t*-test, is indicated by asterisks (ns: non-significant, \*\**p*  
 47 ≤ 0.01).

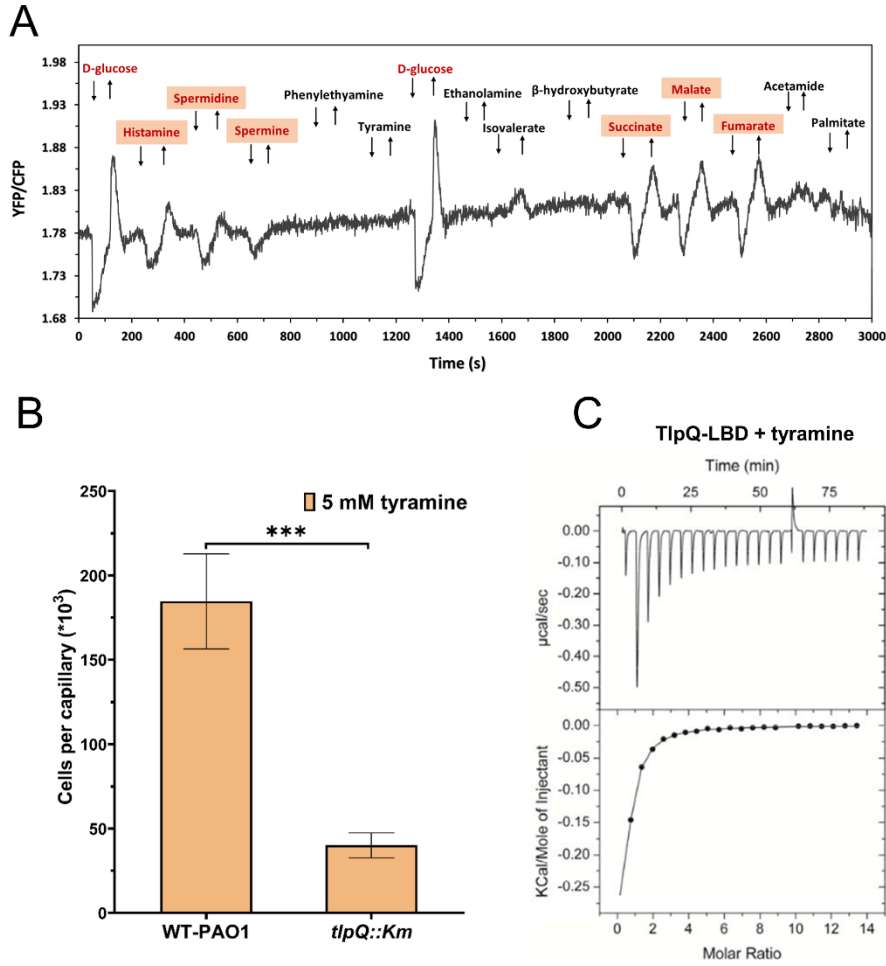

48

49 **Fig. S5 Characterization of TlpQ as a chemoreceptor for tyramine.** (A) Screening of unassigned potential ligands  
 50 for TlpQ-Tar using FRET. FRET measurement was performed for *E. coli* cells expressing TlpQ-Tar as the sole receptor,  
 51 exposed to a stepwise addition (down arrow) and subsequent removal (up arrow) of 100  $\mu$ M D-glucose (positive ligand  
 52 for chimeras), three known ligands (histamine, spermine and spermidine) and other chemical compounds. The  
 53 chemoattractants are shown in red. (B) Capillary chemotaxis assays of *tlpQ* deficient strain and WT-PAO1 (WT-  
 54 Hiroshima) to 5 mM tyramine. Data are shown as the means and standard deviations from three biological replicates  
 55 conducted in triplicate. Significance of difference, assessed using a paired *t*-test, is indicated by asterisks (\*\*\*)  $p \leq$   
 56 0.001). (C) Microcalorimetric studies confirming the binding of tyramine to TlpQ-LBD. The upper panel shows raw  
 57 titration data, whereas the lower panel shows the fit of the integrated concentration-normalized and dilution-heat  
 58 corrected raw data using the single-site binding model. Further experimental details are provided in Table S4.

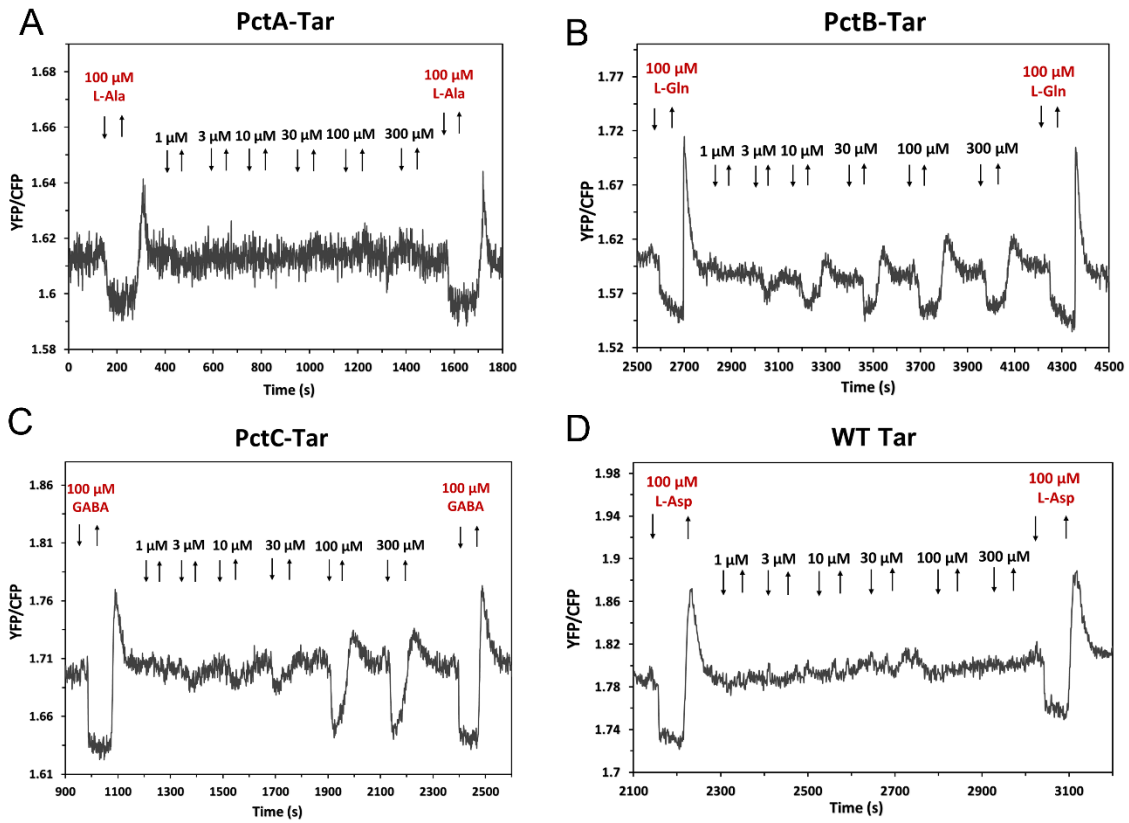

60

61 **Fig. S6 PctB and PctC mediate responses to histamine.** FRET measurements of responses mediated by PctA-Tar  
 62 (A), PctB-Tar (B), PctC-Tar (C) or Tar (D) as a sole receptor to indicated concentrations of histamine.

63

64

65 **Table S1 Growth of *P. aeruginosa* PAO1 in M9 minimal medium supplemented with each of the compounds**  
66 **present in the Biolog plates PM1, PM2A and PM3B as nitrogen source (in nitrogen-free medium) or carbon**  
67 **source (in carbon-free medium).** A total of 202 compounds supported bacterial growth at different levels.  
68 Compounds were divided into different groups according to the magnitude of growth. The 29 highlighted compounds  
69 were further studied using quantitative capillary chemotaxis assays (Fig. 1).

| No. | High bacterial growth<br>( $OD_{600nm} > 0.25$ ) | Medium bacterial growth<br>( $0.25 > OD_{600nm} > 0.1$ ) | Low bacterial growth<br>( $0.1 < OD_{600nm} < 0.05$ ) |
|-----|--------------------------------------------------|----------------------------------------------------------|-------------------------------------------------------|
| 1   | p-Hydroxy Phenyl Acetic Acid                     | Citric Acid                                              | Mucic Acid                                            |
| 2   | D, L-Malic Acid                                  | L-Malic Acid                                             | <b>Tricarballic Acid</b>                              |
| 3   | <b>D-Gluconic Acid</b>                           | <b>Fumaric Acid</b>                                      | D-Glucosaminic Acid                                   |
| 4   | L-Asn                                            | <b>Propionic Acid</b>                                    | Acetoacetic Acid                                      |
| 5   | L-Gln                                            | $\alpha$ -Keto-Glutamic Acid                             | D-Galactonic Acid- $\gamma$ -Lactone                  |
| 6   | L-Ala                                            | Bromo Succinic Acid                                      | Glycolic Acid                                         |
| 7   | L-Pro                                            | <b>Pyruvic Acid</b>                                      | D-Galacturonic Acid                                   |
| 8   | Gly-L-Pro                                        | Acetic Acid                                              | <b>Succinic Acid</b>                                  |
| 9   | Tyramine                                         | $\alpha$ -Hydroxy Butyric Acid                           | <b>Formic Acid</b>                                    |
| 10  | D-Fructose                                       | L-Lactic Acid                                            | m-Hydroxy Phenyl Acetic Acid                          |
| 11  | <b>D-Glucose</b>                                 | $\alpha$ -Hydroxy Glutaric Acid- $\gamma$ -Lactone       | D-Glucuronic Acid                                     |
| 12  | N-Acetyl-Dglucosamine                            | $\alpha$ -Keto-Butyric Acid                              | m-Tartaric Acid                                       |
| 13  | <b>D-Mannitol</b>                                | D-Malic Acid                                             | Mono Methyl Succinate                                 |
| 14  | Glycerol                                         | Methyl Pyruvate                                          | D-Ser                                                 |
| 15  | <b>Itaconic Acid</b>                             | L-Ser                                                    | <b>2-Phenylethylamine</b>                             |
| 16  | <b>5-Amino Valeric Acid</b>                      | L-Thr                                                    | Ammonia                                               |
| 17  | Capric Acid                                      | L-Asp                                                    | $\alpha$ -Methyl-D-Glucoside                          |
| 18  | Sebacic Acid                                     | L-Glu                                                    | D-Fructose-6-Phosphate                                |
| 19  | $\gamma$ -Amino Butyric Acid                     | D-Thr                                                    | D- Psicose                                            |
| 20  | 4-Hydroxy Benzoic Acid                           | D-Ala                                                    | D-Glucose-6-Phosphate                                 |
| 21  | <b><math>\beta</math>-Hydroxy Butyric Acid</b>   | D-Asp                                                    | <b>D-Maltose</b>                                      |
| 22  | Quinic Acid                                      | Gly-L-Glu                                                | L-Fucose                                              |
| 23  | $\gamma$ -Hydroxy Butyric Acid                   | 2-Aminoethanol                                           | D-Glucose-1-Phosphate                                 |
| 24  | Caproic Acid                                     | <b>D-Trehalose</b>                                       | <b>D-Xylose</b>                                       |
| 25  | N-Acetyl-L-Glutamic Acid                         | Maltotriose                                              | D-Cellobiose                                          |
| 26  | L-Pyroglutamic Acid                              | D-Melibiose                                              | L-Arabinose                                           |
| 27  | <b>L-Orn</b>                                     | $\alpha$ -Methyl-D-galactoside                           | N-Acetyl- $\beta$ -D-Mannosamine                      |
| 28  | Hydroxy-Lproline                                 | Sucrose                                                  | Adonitol                                              |
| 29  | L-Ile                                            | Lactulose                                                | D, L- $\alpha$ -Glycerol- Phosphate                   |
| 30  | L-Arg                                            | $\alpha$ -D-Lactose                                      | Dulcitol                                              |



|    |                     |                                      |                                              |
|----|---------------------|--------------------------------------|----------------------------------------------|
| 31 | D, L-Octopamine     | <b>D-Ribose</b>                      | myo-Inositol                                 |
| 32 | Putrescine          | 2-Deoxy Adenosine                    | D-Sorbitol                                   |
| 33 | <b>Glucosamine</b>  | Tween 20                             | Thymidine                                    |
| 34 | Uric Acid           | Tween 40                             | $\alpha$ - Keto-Valeric Acid                 |
| 35 | L-His               | Tween 80                             | 2- Hydroxy Benzoic Acid                      |
| 36 | L-Trp               | <b>Butyric Acid</b>                  | Oxalic Acid                                  |
| 37 | L-Val               | Citramalic Acid                      | $\beta$ -Methyl-D-Glucuronic Acid            |
| 38 | Ala-His             | Sorbic Acid                          | Melibionic Acid                              |
| 39 | Ala-Gln             | Succinamic Acid                      | L-Tartaric Acid                              |
| 40 | Ala-Glu             | Malonic Acid                         | Citraconic Acid                              |
| 41 | Gly-Asn             | D, L-Carnitine                       | N-Acetyl-Neuraminic Acid                     |
| 42 | Gly-Gln             | Laminarin                            | <b>D-Tartaric Acid</b>                       |
| 43 | Ala-Asp             | Turanose                             | L-homoserine                                 |
| 44 | <b>Ethanolamine</b> | Xylitol                              | L- Leu                                       |
| 45 | Agmatine            | D-Arabitol                           | L-Met                                        |
| 46 | Histamine           | $\gamma$ - Amino-N-Butyric Acid      | L-Alaninamide                                |
| 47 | Allantoin           | D, L- $\alpha$ -Amino-N-Butyric Acid | L-Phe-Ala                                    |
| 48 | Urea                | $\alpha$ -Amino-N-Valeric Acid       | Gly-Met                                      |
| 49 | <b>Acetamide</b>    | $\epsilon$ -Amino-N-Caproic Acid     | 3-0- $\beta$ -D-Galactopyranosyl-D-Arabinose |
| 50 | <b>Adenosine</b>    | Parabanic Acid                       | <b>Salicylic acid</b>                        |
| 51 | <b>Inosine</b>      | $\delta$ -Amino-N-Valeric Acid       | D-Raffinose                                  |
| 52 | Adenine             | N-Acetyl-L-Glutamic Acid             | $\beta$ -Methyl-D-Xyloside                   |
| 53 | Guanosine           | N-Phthaloyl-L-Glutamic Acid          | $\alpha$ -Methyl-D-Mannoside                 |
| 54 | <b>Cytosine</b>     | D-Glu                                | Isoatinose                                   |
| 55 | Cytidine            | L-Glu                                | D-Tagatose                                   |
| 56 | Thymine             | L-Lys                                | Gentiobiose                                  |
| 57 | <b>Uridine</b>      | L-Tyr                                | D-Fucose                                     |
| 58 |                     | D-Lys                                | 3-Methyl Glucose                             |
| 59 |                     | D-Asn                                | D-Ribono-1,4-Lactone                         |
| 60 |                     | L-Gly                                | L-Glucose                                    |
| 61 |                     | Ala-Gly                              | D-Melezitose                                 |
| 62 |                     | Ala-Leu                              | $\beta$ -D-Allose                            |
| 63 |                     | Uracil                               | D-Arabinose                                  |
| 64 |                     | Glucuronamide                        | $\beta$ -Methyl-D-Galactoside                |
| 65 |                     | N-Acetyl-D-Glucosamine               | Amygdalin                                    |

|    |  |            |                           |
|----|--|------------|---------------------------|
| 66 |  | Nitrite    | Sedoheptulosan            |
| 67 |  | Nitrate    | N-Acetyl-D-Galactosamine  |
| 68 |  | Xanthosine | N-Acetyl-D-Glucosaminitol |
| 69 |  | Xanthine   | i-Erythritol              |
| 70 |  |            | Lactitol                  |
| 71 |  |            | Maltitol                  |
| 72 |  |            | D-Val                     |
| 73 |  |            | <b>Guanine</b>            |
| 74 |  |            | L- Cys                    |
| 75 |  |            | L-Citrulline              |
| 76 |  |            | Met-Ala                   |

70

71

72

73

74

75

76

77

78

79

80

81

82

83 **Table S2 Summary of FRET responses of 16 hybrid chemoreceptors to tested ligands.** All ligand solutions were at 100  $\mu$ M concentration. The attractant responses  
 84 are shown in red; and the repellent responses are shown in green; “CR”: these responses might be mediated by the cytoplasmic portion of Tar; “--”: no specific responses.  
 85 The numbers are the normalized magnitude of corresponding compound’s response to the magnitude of characterized ligand’s response or D-glucose’s response,  
 86 whichever is greater. Data are shown as the means and standard deviations of results from at least three biological replicates.

| Categories               | Compounds              | Tar                | PctA | PctB | PctC               | PctD | CtpM | PA2867 | PctP                            | TlpQ | PA1646 | PA4844 | PA2573 | PA1251 | PA2788 | PA2920 | McpK | PA4915 |
|--------------------------|------------------------|--------------------|------|------|--------------------|------|------|--------|---------------------------------|------|--------|--------|--------|--------|--------|--------|------|--------|
| Positive control         | D-glucose              | CR                 | CR   | CR   | CR                 | CR   | CR   | CR     | CR                              | CR   | CR     | CR     | CR     | CR     | CR     | CR     | CR   | CR     |
| Organic acids            | Pyruvate               | --                 | --   | --   | --                 | --   | --   | --     | --                              | --   | --     | --     | --     | --     | --     | --     | --   | --     |
|                          | Itaconate              | --                 | --   | --   | --                 | --   | --   | --     | --                              | --   | --     | --     | --     | --     | --     | --     | --   | --     |
|                          | Formate                | --                 | --   | --   | --                 | --   | --   | --     | --                              | --   | --     | --     | --     | --     | --     | --     | --   | --     |
|                          | Fumarate               | CR                 | --   | --   | --                 | --   | --   | --     | --                              | --   | --     | --     | --     | --     | --     | --     | --   | --     |
|                          | Propionate             | --                 | --   | --   | --                 | --   | --   | --     | --                              | --   | --     | --     | --     | --     | --     | --     | --   | --     |
|                          | Succinate              | CR                 | --   | --   | --                 | --   | --   | --     | --                              | --   | --     | --     | --     | --     | --     | --     | --   | --     |
|                          | Butyrate               | --                 | --   | --   | --                 | --   | --   | --     | --                              | --   | --     | --     | --     | --     | --     | --     | --   | --     |
|                          | Glutarate              | --                 | --   | --   | --                 | --   | --   | --     | --                              | --   | --     | --     | --     | --     | --     | --     | --   | --     |
|                          | D-gluconate            | --                 | --   | --   | --                 | --   | --   | --     | --                              | --   | --     | --     | --     | --     | --     | --     | --   | --     |
|                          | D-tartrate             | CR                 | --   | --   | --                 | --   | --   | --     | --                              | --   | --     | --     | --     | --     | --     | --     | --   | --     |
|                          | Salicylate             | --                 | --   | --   | --                 | --   | --   | --     | 2.65 $\pm$<br>0.37 <sup>a</sup> | --   | --     | --     | --     | --     | --     | --     | --   | --     |
|                          | Nicotinate             | --                 | --   | --   | --                 | --   | --   | --     | --                              | --   | --     | --     | --     | --     | --     | --     | --   | --     |
|                          | Isovalerate            | --                 | --   | --   | --                 | --   | --   | --     | --                              | --   | --     | --     | --     | --     | --     | --     | --   | --     |
|                          | 5-Aminovalerate        | --                 | --   | --   | 1.01 $\pm$<br>0.09 | --   | --   | --     | --                              | --   | --     | --     | --     | --     | --     | --     | --   | --     |
|                          | Methyl 4-aminobutyrate | --                 | --   | --   | 0.97 $\pm$<br>0.07 | --   | --   | --     | --                              | --   | --     | --     | --     | --     | --     | --     | --   | --     |
| $\beta$ -hydroxybutyrate | --                     | --                 | --   | --   | --                 | --   | --   | --     | --                              | --   | --     | --     | --     | --     | --     | --     | --   |        |
| Palmitate                | --                     | --                 | --   | --   | --                 | --   | --   | --     | --                              | --   | --     | --     | --     | --     | --     | --     | --   |        |
| Indoleacetate            | --                     | --                 | --   | --   | --                 | --   | --   | --     | --                              | --   | --     | --     | --     | --     | --     | --     | --   |        |
| Sugars                   | D-fructose             | CR                 | --   | --   | --                 | --   | --   | --     | --                              | --   | --     | --     | --     | --     | --     | --     | --   |        |
|                          | D-mannitol             | CR                 | --   | --   | --                 | --   | --   | --     | --                              | --   | --     | --     | --     | --     | --     | --     | --   |        |
|                          | D-xylose               | --                 | --   | --   | --                 | --   | --   | --     | --                              | --   | --     | --     | --     | --     | --     | --     | --   |        |
|                          | D-maltose              | 0.73 $\pm$<br>0.13 | --   | --   | --                 | --   | --   | --     | --                              | --   | --     | --     | --     | --     | --     | --     | --   |        |

|                          |                    |             |             |             |             |    |    |             |             |    |    |    |    |    |    |    |    |    |
|--------------------------|--------------------|-------------|-------------|-------------|-------------|----|----|-------------|-------------|----|----|----|----|----|----|----|----|----|
|                          | D-trehalose        | CR          | --          | --          | --          | -- | -- | --          | --          | -- | -- | -- | -- | -- | -- | -- | -- | -- |
|                          | Glucosamine        | CR          | --          | --          | --          | -- | -- | --          | --          | -- | -- | -- | -- | -- | -- | -- | -- | -- |
| Nucleic acid derivatives | Uridine            | CR          | --          | --          | --          | -- | -- | --          | --          | -- | -- | -- | -- | -- | -- | -- | -- | -- |
|                          | D-ribose           | --          | --          | --          | --          | -- | -- | --          | --          | -- | -- | -- | -- | -- | -- | -- | -- | -- |
|                          | Cytosine           | --          | --          | --          | --          | -- | -- | --          | --          | -- | -- | -- | -- | -- | -- | -- | -- | -- |
|                          | Guanine            |             | --          | --          | --          | -- | -- | 1.22 ± 0.07 | --          | -- | -- | -- | -- | -- | -- | -- | -- | -- |
|                          | Inosine            | --          | --          | --          | --          | -- | -- | 1.03 ± 0.08 | --          | -- | -- | -- | -- | -- | -- | -- | -- | -- |
|                          | Adenine            | --          | --          | --          | --          | -- | -- | 0.79 ± 0.05 | --          | -- | -- | -- | -- | -- | -- | -- | -- | -- |
|                          |                    |             |             |             |             |    |    |             |             |    |    |    |    |    |    |    |    |    |
| Others                   | L-ornithine        | --          | 1.16 ± 0.10 | 1.30 ± 0.13 | --          | -- | -- | --          | --          | -- | -- | -- | -- | -- | -- | -- | -- | -- |
|                          | Ethanolamine       | --          | --          | --          | --          | -- | -- | --          | --          | -- | -- | -- | -- | -- | -- | -- | -- | -- |
|                          | 2-Phenylethylamine | --          | --          | --          | --          | -- | -- | --          | --          | -- | -- | -- | -- | -- | -- | -- | -- | -- |
|                          | Acetamide          | --          | --          | --          | --          | -- | -- | --          | --          | -- | -- | -- | -- | -- | -- | -- | -- | -- |
|                          | Caffeine           | --          | --          | --          | --          | -- | -- | --          | --          | -- | -- | -- | -- | -- | -- | -- | -- | -- |
| pH                       | pH6.0              | 1.18 ± 0.16 | 0.71 ± 0.16 | --          | 1.06 ± 0.09 | -- | -- | 1.92 ± 0.17 | 1.36 ± 0.20 | -- | -- | -- | -- | -- | -- | -- | -- | -- |
|                          | pH8.0              | 0.96 ± 0.11 | 1.02 ± 0.22 | --          | 2.31 ± 0.17 | -- | -- | 0.99 ± 0.11 | 0.57 ± 0.12 | -- | -- | -- | -- | -- | -- | -- | -- | -- |

87 <sup>a</sup>*E. coli* cells expressing PA2867-Tar showed a repellent response to salicylate. However, salicylate binding to PA2867 could not be confirmed because of the failure  
88 to purify PA2867-LBD as a stable protein, and characterization of this putative ligand was not further pursued.

89

90 Table S3 Strains, plasmids and oligonucleotides used in this study.

| Strains and plasmids                               | Genotype or relevant characteristics <sup>a</sup>                                                                                                                                                                              | Reference |
|----------------------------------------------------|--------------------------------------------------------------------------------------------------------------------------------------------------------------------------------------------------------------------------------|-----------|
| <b>Strains</b>                                     |                                                                                                                                                                                                                                |           |
| <i>Escherichia coli</i> BL21(DE3)                  | F <sup>-</sup> <i>ompT gal dcm lon hsdS<sub>B</sub>(r<sub>B</sub><sup>-</sup>m<sub>B</sub><sup>-</sup>)</i> λ (DE3 [ <i>lacI lacUV5-T7p07 ind1 sam7 nin5</i> ]) [ <i>malB</i> <sup>+</sup> ] <sub>K-12</sub> (λ <sup>S</sup> ) | (1)       |
| <i>E. coli</i> DH5α                                | F <sup>-</sup> <i>endA1 glnV44 thi-1 recA1 relA1 gyrA96 deoR nupG purB20 φ80dlacZΔM15 Δ(lacZYA-argF)</i> U169, <i>hsdR17(r<sub>K</sub><sup>-</sup>m<sub>K</sub><sup>+</sup>)</i> , λ <sup>-</sup>                              | (2)       |
| <i>E. coli</i> UU1250                              | Derivative of RP437; Δ <i>aerΔtsrΔ(tar-tap) Δtrg</i>                                                                                                                                                                           | (3)       |
| <i>E. coli</i> VS181                               | Derivative of RP437; Δ( <i>cheYcheZ</i> )Δ <i>aerΔtsrΔ(tar-tap) Δtrg</i>                                                                                                                                                       | (4)       |
| <i>E. coli</i> CC118λpir                           | <i>araD Δ(ara, leu) ΔlacZ74 phoA20 galK thi-1 rspE rpoB argE recA1 λpir</i>                                                                                                                                                    | (5)       |
| <i>Pseudomonas aeruginosa</i> PAO1 (WT-Hiroshima)  | Prototroph, FP <sup>-</sup> (sex factor minus)                                                                                                                                                                                 | (6)       |
| <i>tlpQ::Km</i>                                    | PAO1 derivative, <i>PA2654::Km</i> ; Km <sup>R</sup>                                                                                                                                                                           | (8)       |
| <i>pctA::Km</i>                                    | PAO1 derivative, <i>PA4309::Km</i> ; Km <sup>R</sup>                                                                                                                                                                           | (9)       |
| <i>pctB::Km</i>                                    | PAO1 derivative, <i>PA4310::Km</i> ; Km <sup>R</sup>                                                                                                                                                                           | (10)      |
| <i>pctC::Km</i>                                    | PAO1 derivative, <i>PA4307::Km</i> ; Km <sup>R</sup>                                                                                                                                                                           | (10)      |
| <i>Pseudomonas aeruginosa</i> PAO1 (WT-Washington) | Wild type strain                                                                                                                                                                                                               | (7)       |
| <i>PA1251::ISlacZ</i>                              | PAO1 derivative, <i>PA1251::ISlacZ</i> ; Tc <sup>R</sup>                                                                                                                                                                       | (7)       |
| <i>PA1646::ISphoA</i>                              | PAO1 derivative, <i>PA1646::ISphoA</i> ; Tc <sup>R</sup>                                                                                                                                                                       | (7)       |
| <i>PA2867::ISlacZ</i>                              | PAO1 derivative, <i>PA2867::ISlacZ</i> ; Tc <sup>R</sup>                                                                                                                                                                       | (7)       |
| <i>PA2920::ISlacZ</i>                              | PAO1 derivative, <i>PA2961::ISlacZ</i> ; Tc <sup>R</sup>                                                                                                                                                                       | (7)       |
| <i>PA4290::ISphoA</i>                              | PAO1 derivative, <i>PA4290::ISphoA</i> ; Tc <sup>R</sup>                                                                                                                                                                       | (7)       |
| <i>PA4520::ISphoA</i>                              | PAO1 derivative, <i>PA4520::ISphoA</i> ; Tc <sup>R</sup>                                                                                                                                                                       | (7)       |

|                       |                                                          |            |
|-----------------------|----------------------------------------------------------|------------|
| <i>PA4915::ISphoA</i> | PAO1 derivative, <i>PA4915::ISphoA</i> ; Tc <sup>R</sup> | (7)        |
| <i>mcpA::ISphoA</i>   | PAO1 derivative, <i>PA0180::ISphoA</i> ; Tc <sup>R</sup> | (7)        |
| <i>mcpS::ISlacZ</i>   | PAO1 derivative, <i>PA1930::ISlacZ</i> ; Tc <sup>R</sup> | (7)        |
| <i>ctpH::ISlacZ</i>   | PAO1 derivative, <i>PA2561::ISlacZ</i> ; Tc <sup>R</sup> | (7)        |
| <i>ctpM::ISlacZ</i>   | PAO1 derivative, <i>PA2652::ISlacZ</i> ; Tc <sup>R</sup> | (7)        |
| <i>mcpN::ISlacZ</i>   | PAO1 derivative, <i>PA2788::ISlacZ</i> ; Tc <sup>R</sup> | (7)        |
| <i>pctD::ISlacZ</i>   | PAO1 derivative, <i>PA4633::ISlacZ</i> ; Tc <sup>R</sup> | (7)        |
| <i>ctpL::ISphoA</i>   | PAO1 derivative, <i>PA4844::ISphoA</i> ; Tc <sup>R</sup> | (7)        |
| $\Delta$ <i>McpK</i>  | PAO1 derivative, $\Delta$ <i>PA5072</i>                  | (11)       |
| <i>pctP::Sm</i>       | PAO1 derivative, <i>PA1608::Sm</i> ; Sm <sup>R</sup>     | This study |

#### Plasmids

|            |                                                                                                                           |            |
|------------|---------------------------------------------------------------------------------------------------------------------------|------------|
| pET28a (+) | Km <sup>R</sup> ; Protein expression vector                                                                               | Novagen    |
| pKG116     | Cm <sup>R</sup> ; Expression vector, salicylate inducible; for generation Type 2 and Type 3 hybrid chemoreceptor          | (12)       |
| pKNG101    | Sm <sup>R</sup> ; OriR6K mob, mutant generation vector                                                                    | (13)       |
| pGEMT®     | Ap <sup>R</sup> ; mutant generation vector                                                                                | Invitrogen |
| pHC8       | Ap <sup>R</sup> ; Expression vector, salicylate inducible; for generation type 1 hybrid chemoreceptor                     | This study |
| pSB13      | Cm <sup>R</sup> ; Tar expression plasmid, pKG116 derivative, T768 was mutated to C768 to remove the NdeI restriction site | (14)       |
| pVS88      | Ap <sup>R</sup> ; CheY-EYFP / CheZ-ECFP expression plasmid used for type 2 and type 3 hybrid chemoreceptor                | (4)        |
| pWX16      | Cm <sup>R</sup> ; CheY-EYFP / CheZ-ECFP expression plasmid used for type 1 hybrid chemoreceptor                           | This study |
| pOB30      | Ap <sup>R</sup> ; GFP expression plasmid                                                                                  | (15)       |

|                  |                                                                                       |            |
|------------------|---------------------------------------------------------------------------------------|------------|
| pET28_PA2654-LBD | Km <sup>R</sup> ; pET28a (+) derivative containing a DNA fragment encoding PA2654-LBD | This study |
| pET28_PA4915-LBD | Km <sup>R</sup> ; pET28a (+) derivative containing a DNA fragment encoding PA4915-LBD | This study |
| pET28_PA4844-LBD | Km <sup>R</sup> ; pET28a (+) derivative containing a DNA fragment encoding PA4844-LBD | This study |
| pET28_PA5072-LBD | Km <sup>R</sup> ; pET28a (+) derivative containing a DNA fragment encoding PA5072-LBD | This study |
| pET28_PA2788-LBD | Km <sup>R</sup> ; pET28a (+) derivative containing a DNA fragment encoding PA2788-LBD | This study |
| pET28_PA4310-LBD | Km <sup>R</sup> ; pET28a (+) derivative containing a DNA fragment encoding PA4310-LBD | This study |
| pET28_PA4309-LBD | Km <sup>R</sup> ; pET28a (+) derivative containing a DNA fragment encoding PA4309-LBD | This study |
| pET28_PA4307-LBD | Km <sup>R</sup> ; pET28a (+) derivative containing a DNA fragment encoding PA4307-LBD | This study |
| pET28_PA4633-LBD | Km <sup>R</sup> ; pET28a (+) derivative containing a DNA fragment encoding PA4633-LBD | This study |
| pET28_PA1608-LBD | Km <sup>R</sup> ; pET28a (+) derivative containing a DNA fragment encoding PA1608-LBD | This study |
| pET28_PA2573-LBD | Km <sup>R</sup> ; pET28a (+) derivative containing a DNA fragment encoding PA2573-LBD | This study |
| pET28_PA2652-LBD | Km <sup>R</sup> ; pET28a (+) derivative containing a DNA fragment encoding PA2652-LBD | This study |
| pET28_PA2867-LBD | Km <sup>R</sup> ; pET28a (+) derivative containing a DNA fragment encoding PA2867-LBD | This study |
| pET28_PA2920-LBD | Km <sup>R</sup> ; pET28a (+) derivative containing a DNA fragment encoding PA2920-LBD | This study |

|                  |                                                                                                      |            |
|------------------|------------------------------------------------------------------------------------------------------|------------|
| pET28_PA1251-LBD | Km <sup>R</sup> ; pET28a (+) derivative containing a DNA fragment encoding PA1251-LBD                | This study |
| pET28_PA1646-LBD | Km <sup>R</sup> ; pET28a (+) derivative containing a DNA fragment encoding PA1646-LBD                | This study |
| pET28_PA2561-LBD | Km <sup>R</sup> ; pET28a (+) derivative containing a DNA fragment encoding PA2561-LBD                | This study |
| pET28_PA4520-LBD | Km <sup>R</sup> ; pET28a (+) derivative containing a DNA fragment encoding PA4520-LBD                | This study |
| PA2654-Tar_T1    | Ap <sup>R</sup> ; pHC8 derivative containing a DNA fragment encoding PA2654 [1-373]-Tar [198-553];   | This study |
| PA4915-Tar_T1    | Ap <sup>R</sup> ; pHC8 derivative containing a DNA fragment encoding PA4915 [1-198]-Tar [198-553];   | This study |
| PA4844-Tar_T1    | Ap <sup>R</sup> ; pHC8 derivative containing a DNA fragment encoding PA4844 [1-312]-Tar [198-553];   | This study |
| PA2573-Tar_T1    | Ap <sup>R</sup> ; pHC8 derivative containing a DNA fragment encoding PA2573 [1-190]-Tar [198-553];   | This study |
| PA2788-Tar_T1    | Ap <sup>R</sup> ; pHC8 derivative containing a DNA fragment encoding PA2788 [1-187]-Tar [198-553];   | This study |
| PA4310-Tar_T1    | Ap <sup>R</sup> ; pHC8 derivative containing a DNA fragment encoding PA4310 [1-288]-Tar [198-553];   | This study |
| PA4310-Tar_T2    | Cm <sup>R</sup> ; pKG116 derivative containing a DNA fragment encoding PA4310 [1-353]-Tar [268-553]; | (16)       |
| PA4309-Tar_T1    | Ap <sup>R</sup> ; pHC8 derivative containing a DNA fragment encoding PA4309 [1-288]-Tar [198-553];   | This study |
| PA4309-Tar_T2    | Cm <sup>R</sup> ; pKG116 derivative containing a DNA fragment encoding PA4309 [1-354]-Tar [269-553]; | (16)       |
| PA4307-Tar_T1    | Ap <sup>R</sup> ; pHC8 derivative containing a DNA fragment encoding PA4307 [1-291]-Tar [198-553];   | This study |



|               |                                                                                                            |            |
|---------------|------------------------------------------------------------------------------------------------------------|------------|
| PA4307-Tar_T2 | Cm <sup>R</sup> ; pKG116 derivative containing a DNA fragment encoding PA4307 [1-356]-Tar [268-553];       | (17)       |
| PA4633-Tar_T1 | Ap <sup>R</sup> ; pHC8 derivative containing a DNA fragment encoding PA4633 [1-369]-Tar [198-553];         | This study |
| PA4633-Tar_T2 | Cm <sup>R</sup> ; pKG116 derivative containing a DNA fragment encoding PA4633 [1-435]-Tar [267-553];       | (18)       |
| PA1608-Tar_T1 | Ap <sup>R</sup> ; pHC8 derivative containing a DNA fragment encoding PA1608 [1-187]-Tar [198-553];         | This study |
| PA1608-Tar_T2 | Cm <sup>R</sup> ; pKG116 derivative containing a DNA fragment encoding PA1608 [1-264]-Tar [267-553];       | This study |
| PA2652-Tar_T1 | Ap <sup>R</sup> ; pHC8 derivative containing a DNA fragment encoding PA2652 [1-220]-Tar [198-553];         | This study |
| PA2652-Tar_T2 | Cm <sup>R</sup> ; pKG116 derivative containing a DNA fragment encoding PA2652 [1-284]-Tar [267-553];       | This study |
| PA5072-Tar_T1 | Ap <sup>R</sup> ; pHC8 derivative containing a DNA fragment encoding PA5072 [1-299]-Tar [198-553];         | This study |
| PA5072-Tar_T3 | Cm <sup>R</sup> ; pKG116 derivative containing a DNA fragment encoding PA5072 [1-299]-VLYHC-Tar [203-553]; | This study |
| PA2867-Tar_T1 | Ap <sup>R</sup> ; pHC8 derivative containing a DNA fragment encoding PA2867 [1-149]-Tar [198-553];         | This study |
| PA2867-Tar_T3 | Cm <sup>R</sup> ; pKG116 derivative containing a DNA fragment encoding PA2867 [1-149]-PTTTA-Tar [203-553]; | This study |
| PA2920-Tar_T1 | Ap <sup>R</sup> ; pHC8 derivative containing a DNA fragment encoding PA2920 [1-203]-Tar [198-553];         | This study |
| PA2920-Tar_T3 | Cm <sup>R</sup> ; pKG116 derivative containing a DNA fragment encoding PA2920 [1-203]-CLAPP-Tar [203-553]; | This study |
| PA1251-Tar_T1 | Ap <sup>R</sup> ; pHC8 derivative containing a DNA fragment encoding PA1251 [1-197]-Tar [198-553];         | This study |

|                |                                                                                                            |            |
|----------------|------------------------------------------------------------------------------------------------------------|------------|
| PA1251-Tar_T3  | Cm <sup>R</sup> ; pKG116 derivative containing a DNA fragment encoding PA1251 [1-197]-IWSLA-Tar [203-553]; | This study |
| PA1646-Tar_T1  | Ap <sup>R</sup> ; pHC8 derivative containing a DNA fragment encoding PA1646 [1-313]-Tar [198-553];         | This study |
| PA1646-Tar_T3  | Cm <sup>R</sup> ; pKG116 derivative containing a DNA fragment encoding PA1646 [1-313]-CLYMA-Tar [203-553]; | This study |
| PA2561-Tar_T1  | Ap <sup>R</sup> ; pHC8 derivative containing a DNA fragment encoding PA2561 [1-224]-Tar [198-553];         | This study |
| PA2561-Tar_T3  | Cm <sup>R</sup> ; pKG116 derivative containing a DNA fragment encoding PA2561 [1-224]-NYKNG-Tar [203-553]; | This study |
| PA4520-Tar_T1  | Ap <sup>R</sup> ; pHC8 derivative containing a DNA fragment encoding PA4520 [1-331]-Tar [198-553];         | This study |
| PA4520-Tar_T3  | Cm <sup>R</sup> ; pKG116 derivative containing a DNA fragment encoding PA2520 [1-331]-LICDS-Tar [203-553]; | This study |
| pGEMT®-PA1608  | Ap <sup>R</sup> ; pGEMT® derivative containing DNA fragment of PA1608                                      | This study |
| pKNG101-PA1608 | Sm <sup>R</sup> ; pKNG101 derivative containing DNA fragment of PA1608                                     | This study |

91 <sup>a</sup>Ap, ampicillin; Km, kanamycin; Tc, tetracycline; Cm, chloramphenicol; Sm, streptomycin

92

| Oligonucleotide | Sequence (5'-3')                                   | Purpose                             |
|-----------------|----------------------------------------------------|-------------------------------------|
| PA2654-LBD_F    | GTGCCGCGCGGCAGCCATATGCAACATTCCAGTGTT<br>CTGGTTAAG  | Construction of<br>pET28_PA2654-LBD |
| PA2654-LBD_R    | ACGGAGCTCGAATTCGGATCCCTATTCGCGGCGCAT<br>GTCATCAAGT |                                     |
| PA4915-LBD_F    | GTGCCGCGCGGCAGCCATATGTCTCGTCTGGACGCA<br>AGCTT      | Construction of<br>pET28_PA4915-LBD |
| PA4915-LBD_R    | ACGGAGCTCGAATTCGGATCCCTAGCGCATACTATC<br>GTAGCGTTT  |                                     |

|              |                                                    |                                     |
|--------------|----------------------------------------------------|-------------------------------------|
| PA4844-LBD_F | GTGCCGCGCGGCAGCCATATGCGCGCCATGGAACGT<br>CCGT       | Construction of<br>pET28_PA4844-LBD |
| PA4844-LBD_R | ACGGAGCTCGAATTCGGATCCCTACTGCCCTTGCAA<br>ACGCTGAC   |                                     |
| PA2573-LBD_F | GTGCCGCGCGGCAGCCATATGCGCCTTGGGAAAGCA<br>TTAAGTG    | Construction of<br>pET28_PA2573-LBD |
| PA2573-LBD_R | ACGGAGCTCGAATTCGGATCCCTAACGCATGCTATCT<br>TCACGCGC  |                                     |
| PA2788-LBD_F | GTGCCGCGCGGCAGCCATATGAGTATGAGCATCTCG<br>CCGAAA     | Construction of<br>pET28_PA2788-LBD |
| PA2788-LBD_R | ACGGAGCTCGAATTCGGATCCCTACTGAGTATGCTG<br>AACAGAATCC |                                     |
| PA4310-LBD_F | GTGCCGCGCGGCAGCCATATGAATGATAGCTTACAG<br>CGTGCTT    | Construction of<br>pET28_PA4310-LBD |
| PA4310-LBD_R | ACGGAGCTCGAATTCGGATCCCTAGCTAGTGCGCAG<br>TTTGTT     |                                     |
| PA4309-LBD_F | GTGCCGCGCGGCAGCCATATGAACGACTACTTACAG<br>CGCAAC     | Construction of<br>pET28_PA4309-LBD |
| PA4309-LBD_R | ACGGAGCTCGAATTCGGATCCCTAGCTAACGCGAAA<br>TTTTGACAGC |                                     |
| PA4307-LBD_F | GTGCCGCGCGGCAGCCATATGGACTACCGTCAGCGT<br>GAAG       | Construction of<br>pET28_PA4307-LBD |
| PA4307-LBD_R | ACGGAGCTCGAATTCGGATCCCTACGAGGTACGAAA<br>CTCTGAG    |                                     |
| PA4633-LBD_F | GTGCCGCGCGGCAGCCATATGCGCACCCAAGAAGTGT<br>GTTC      | Construction of<br>pET28_PA4633-LBD |
| PA4633-LBD_R | ACGGAGCTCGAATTCGGATCCCTAACTCATCCCCAG<br>AATATCCTG  |                                     |
| PA1608-LBD_F | GTGCCGCGCGGCAGCCATATGCGCATGGGCAGCCTG<br>AACGA      | Construction of<br>pET28_PA1608-LBD |
| PA1608-LBD_R | ACGGAGCTCGAATTCGGATCCCTAGCTGTGGTATACT<br>TCATCA    |                                     |
| PA2652-LBD_F | GTGCCGCGCGGCAGCCATATGAAGAAGCAGGCCGAT<br>GCCGA      | Construction of<br>pET28_PA2652-LBD |
| PA2652-LBD_R | ACGGAGCTCGAATTCGGATCCCTAGGTGCCGATGCG<br>CTCGTCAAT  |                                     |

|              |                                                    |                                              |
|--------------|----------------------------------------------------|----------------------------------------------|
| PA5072-LBD_F | GTGCCGCGCGGCAGCCATATGAGCAATCGTACCTTA<br>ACCCATC    | Construction of<br>pET28_PA5072-LBD          |
| PA5072-LBD_R | ACGGAGCTCGAATTCGGATCCCTAACGATCACGGGA<br>CGCGGTA    |                                              |
| PA2867-LBD_F | GTGCCGCGCGGCAGCCATATGCAACAAGAAGCCGCG<br>GGG        | Construction of<br>pET28_PA2867-LBD          |
| PA2867-LBD_R | ACGGAGCTCGAATTCGGATCCCTAACGATCTGCAAA<br>CACTTGCCAA |                                              |
| PA2920-LBD_F | GTGCCGCGCGGCAGCCATATGCAATTAATGAAAGC<br>AATCAACG    | Construction of<br>pET28_PA2920-LBD          |
| PA2920-LBD_R | ACGGAGCTCGAATTCGGATCCCTACTGCTGCCAACG<br>ATGGC      |                                              |
| PA1251-LBD_F | GTGCCGCGCGGCAGCCATATGCGCATGGGTAGCCTG<br>AATCG      | Construction of<br>pET28_PA1251-LBD          |
| PA1251-LBD_R | ACGGAGCTCGAATTCGGATCCCTAATCTGCCGCTCA<br>GCTGTAGA   |                                              |
| PA1646-LBD_F | GTGCCGCGCGGCAGCCATATGCAACGCTTTGCCCGC<br>TTACA      | Construction of<br>pET28_PA1646-LBD          |
| PA1646-LBD_R | ACGGAGCTCGAATTCGGATCCCTACGAATTTGTGCG<br>CAGGGAGTG  |                                              |
| PA2561-LBD_F | GTGCCGCGCGGCAGCCATATGACCGGTGATGTGCGT<br>GCATAT     | Construction of<br>pET28_PA2561-LBD          |
| PA2561-LBD_R | ACGGAGCTCGAATTCGGATCCCTAGGTGCGACGCGC<br>CTCAGCGCT  |                                              |
| PA4520-LBD_F | GTGCCGCGCGGCAGCCATATGTATCTGGTACGTGAC<br>GCATAC     | Construction of<br>pET28_PA4520-LBD          |
| PA4520-LBD_R | ACGGAGCTCGAATTCGGATCCCTACTGCGTACGGAC<br>CTGTTGT    |                                              |
| PA1608_MUT_F | AGTTTCGCCCTGATCACCG                                | Construction of<br>pKNG101-PA1608            |
| PA1608_MUT_R | TTCCTGGATGTTGGCGATCAT                              |                                              |
| pKG116-seq_F | AAGCCATAAGGAGTACCATATG                             | Sequencing for hybrid<br>Chemoreceptor_T2&T3 |
| pKG116-seq_R | TTACTTATTTATCCGCGGATC                              |                                              |
| pET28a-seq_F | GTGCCGCGCGGCAGCCATATG                              | Sequencing for LBD<br>expression plasmids    |
| pET28a-seq_R | ACGGAGCTCGAATTCGGATCCCTA                           |                                              |
| Hybrid-Seq_F | AGCCATAAGGAGTACCATATG                              | Sequencing for hybrid                        |

|                 |                                                         |                                             |
|-----------------|---------------------------------------------------------|---------------------------------------------|
| Hybrid-Seq_R    | AGCAGAATCAATACCACCAC                                    | Chemoreceptor_T1                            |
| PA1608-T2_F1    | AGCCATAAGGAGTACCATATGATGTCTTTGCGCAGT<br>ATGCC           | Construction of PA1608-<br>Tar_T2           |
| PA1608-T2_R1    | CCTTCGCGGACATGCTGGATGGTCTGGCGCAGTTG                     |                                             |
| PA1608-T2_F2    | CATCCAGCATGTCCGCGAAGGTTTCAGAT                           |                                             |
| Tar-T2_R2       | GGATCCTCAAAATGTTTCCCAGTTT                               |                                             |
| PA2652-T2_F1    | AGCCATAAGGAGTACCATATGATGCGTCTGACCCTG<br>AA              | Construction of PA2652-<br>Tar_T2           |
| PA2652-T2_R1    | CCTTCGCGGACATGCCGCACCAGACCGTGGATC                       |                                             |
| PA2652-T2_F2    | GTGCGGCATGTCCGCGAAGGTTTCAGAT                            |                                             |
| Tar-T3_F        | TTGATTCTGCTGGTGGCGTG                                    | Construction for hybrid<br>Chemoreceptor_T3 |
| pKG116_Tar-T3_R | TACTTATTTATCCGCGGATCCTCAAAATGTTTCCCAG<br>TTTGGATCTTG    |                                             |
| PA5072-T3_F     | AGCCATAAGGAGTACCATATGATGTATGATTGGTGG<br>GTCTTG          | Construction of PA5072-<br>Tar_T3           |
| PA5072-T3_R     | CCACCAGCAGAATCAANNNNNNNNNNNNNNNNGGCT<br>GCAATCAGCCATAA  |                                             |
| PA2867-T3_F     | AGCCATAAGGAGTACCATATGATGGGTACGTGGATT<br>TCGGAT          | Construction of PA2867-<br>Tar_T3           |
| PA2867-T3_R     | CCACCAGCAGAATCAANNNNNNNNNNNNNNNNAAGC<br>ATCAGCACTAAAAC  |                                             |
| PA2920-T3_F     | AGCCATAAGGAGTACCATATGATGCTGCAATGGTTC<br>GCC             | Construction of PA2920-<br>Tar_T3           |
| PA2920-T3_R     | CCACCAGCAGAATCAANNNNNNNNNNNNNNNNCAAC<br>AGTCCAAAGGCAAC  |                                             |
| PA1251-V3_F     | AGCCATAAGGAGTACCATATGATGCTTCTTCGTCGCA<br>TT             | Construction of PA1251-<br>Tar_T3           |
| PA1251-T3_R     | CCACCAGCAGAATCAANNNNNNNNNNNNNNNNTAAC<br>AACACTGCCAGAATG |                                             |
| PA1646-T3_F     | AGCCATAAGGAGTACCATATGATGTTGGGATTATTA<br>CGTCG           | Construction of PA1646-<br>Tar_T3           |
| PA1646-T3_R     | CCACCAGCAGAATCAANNNNNNNNNNNNNNNNAACC<br>AGCAATGCTAAAAC  |                                             |
| PA2561-T3_F     | AGCCATAAGGAGTACCATATGATGCCTGCTTCTCCTG<br>G              | Construction of PA2561-<br>Tar_T3           |

|             |                                                          |                                   |
|-------------|----------------------------------------------------------|-----------------------------------|
| PA2561-T3_R | CCACCAGCAGAATCAANNNNNNNNNNNNNNNNNNACCA<br>ATCAGCACCAATGA |                                   |
| PA4520-T3_F | AGCCATAAGGAGTACCATATGATGAAAACCGTATTG<br>TACCCG           | Construction of PA4520-<br>Tar_T3 |
| PA4520-T3_R | CCACCAGCAGAATCAANNNNNNNNNNNNNNNNNCACC<br>ACCGCCAACGCTGC  |                                   |

93

94

95

96

97

98

99

100

101

102

103

104 **Table S4 Experimental conditions used for microcalorimetric titrations**

| Protein    |                    | Ligand                 |                    | Temperature (°C) | Injection volume (μL) | Analysis buffer composition                                                   |
|------------|--------------------|------------------------|--------------------|------------------|-----------------------|-------------------------------------------------------------------------------|
| Name       | Concentration (μM) | Name                   | Concentration (mM) |                  |                       |                                                                               |
| PctA-LBD   | 39                 | L-ornithine            | 1                  | 30               | 4.8                   | 5 mM Tris, 5 mM Pipes, 5 mM Mes, 10 % glycerol (vol/vol), 150 mM NaCl, pH 7.0 |
| PctB-LBD   | 50                 | L-ornithine            | 20                 | 30               | 12.8                  | 5 mM Tris, 5 mM Pipes, 5 mM Mes, 10 % glycerol (vol/vol), 150 mM NaCl, pH 7.0 |
| PctC-LBD   | 120                | Methyl 4-aminobutyrate | 20                 | 25               | 14.4                  | 5 mM Tris, 5 mM Pipes, 5 mM Mes, 10 % glycerol (vol/vol), 150 mM NaCl, pH 7.0 |
|            | 120                | 5-aminovalerate        | 5                  | 25               | 3.2                   |                                                                               |
| TlpQ-LBD   | 93                 | 2-phenylethylamine     | 20                 | 15               | 11.2                  | 5 mM Tris, 5 mM Pipes, 5 mM Mes, 10 % glycerol (vol/vol), 150 mM NaCl, pH 7.0 |
|            | 147                | Tyramine               | 20                 | 25               | 6.4                   |                                                                               |
| PA1608-LBD | 65                 | Hypoxanthine           | 2                  | 20               | 4.8                   | 10 mM sodium phosphate, pH 5.5                                                |
| PA4915-LBD | 92                 | 2-phenylethylamine     | 5                  | 25               | 12.8                  | 40 mM Potassium phosphate, 10 % glycerol (vol/vol), pH 7.0                    |

105

106

107

108

109

110

111

112

113

114 **References**

- 115 1. Jeong H, Barbe V, Lee CH, Vallenet D, Yu DS, Choi SH, Couloux A, Lee SW, Yoon SH, Cattolico L, Hur  
116 CG, Park HS, Ségurens B, Kim SC, Oh TK, Lenski RE, Studier FW, Daegelen P, Kim JF. 2009. Genome  
117 sequences of *Escherichia coli* B strains REL606 and BL21(DE3). *J Mol Biol* 394:644–652.
- 118 2. Woodcock DM, Crowther PJ, Doherty J, Jefferson S, Decruz E, Noyer-Weidner M, Smith SS, Michael MZ,  
119 Graham MW. 1989. Quantitative evaluation of *Escherichia coli* host strains for tolerance to cytosine  
120 methylation in plasmid and phage recombinants. *Nucleic Acids Res* 17:3469–3478.
- 121 3. Ames P, Studdert CA, Reiser RH, Parkinson JS. 2002. Collaborative signaling by mixed chemoreceptor  
122 teams in *Escherichia coli*. *Proc Natl Acad Sci U S A* 99:7060–7065.
- 123 4. Sourjik V, Berg HC. 2004. Functional interactions between receptors in bacterial chemotaxis. *Nature*  
124 428:437–441.
- 125 5. Herrero M, De Lorenzo V, Timmis KN. 1990. Transposon vectors containing non-antibiotic resistance  
126 selection markers for cloning and stable chromosomal insertion of foreign genes in gram-negative bacteria. *J*  
127 *Bacteriol* 172:6557–6567.
- 128 6. Holloway BW, Krishnapillai V, Morgan AF. 1979. Chromosomal genetics of *Pseudomonas*. *Microbiol Rev*  
129 43:73–102.
- 130 7. Jacobs MA, Alwood A, Thaipisuttikul I, Spencer D, Haugen E, Ernst S, Will O, Kaul R, Raymond C, Levy  
131 R, Chun-Rong L, Guenther D, Bovee D, Olson M V., Manoil C. 2003. Comprehensive transposon mutant  
132 library of *Pseudomonas aeruginosa*. *Proc Natl Acad Sci U S A* 100:14339–14344.
- 133 8. Kim HE, Shitashiro M, Kuroda A, Takiguchi N, Kato J. 2007. Ethylene Chemotaxis in *Pseudomonas*  
134 *aeruginosa* and Other *Pseudomonas* Species. *Microbes Environ* 22:186–189.
- 135 9. Kuroda A, Kumano T, Taguchi K, Nikata T, Kato J, Ohtake H. 1995. Molecular cloning and characterization  
136 of a chemotactic transducer gene in *Pseudomonas aeruginosa*. *J Bacteriol* 177:7019.
- 137 10. Taguchi K, Fukutomi H, Kuroda A, Kato J, Ohtake H. 1997. Genetic identification of chemotactic  
138 transducers for amino acids in *Pseudomonas aeruginosa* 3223–3229.
- 139 11. Martín-Mora D, Ortega A, Reyes-Darias JA, García V, López-Farfán D, Matilla MA, Krell T. 2016.  
140 Identification of a Chemoreceptor in *Pseudomonas aeruginosa* That Specifically Mediates Chemotaxis  
141 Toward  $\alpha$ -Ketoglutarate. *Front Microbiol* 7.
- 142 12. Burón-Barral MDC, Gosink KK, Parkinson JS. 2006. Loss- and gain-of-function mutations in the F1-HAMP  
143 region of the *Escherichia coli* aerotaxis transducer Aer. *J Bacteriol* 188:3477–3486.



- 144 13. Kaniga K, Delor I, Cornelis GR. 1991. A wide-host-range suicide vector for improving reverse genetics in  
145 Gram-negative bacteria: inactivation of the blaA gene of *Yersinia enterocolitica*. *Gene* 109:137–141.
- 146 14. Bi S, Jin F, Sourjik V. 2018. Inverted signaling by bacterial chemotaxis receptors. *Nat Commun* 9.
- 147 15. Bi S, Pollard AM, Yang Y, Jin F, Sourjik V. 2016. Engineering Hybrid Chemotaxis Receptors in Bacteria.  
148 *ACS Synth Biol* 5:989–1001.
- 149 16. Reyes-Darias JA, Yang Y, Sourjik V, Krell T. 2015. Correlation between signal input and output in PctA and  
150 PctB amino acid chemoreceptor of *Pseudomonas aeruginosa*. *Mol Microbiol* 96:513–525.
- 151 17. Reyes-Darias JA, García V, Rico-Jiménez M, Corral-Lugo A, Lesouhaitier O, Juárez-Hernández D, Yang Y,  
152 Bi S, Feuilloley M, Muñoz-Rojas J, Sourjik V, Krell T. 2015. Specific gamma-aminobutyrate chemotaxis in  
153 *pseudomonads* with different lifestyle. *Mol Microbiol* 97:488–501.
- 154 18. Matilla MA, Velando F, Tajuelo A, Martín-Mora D, Xu W, Sourjik V, Gavira JA, Krell T. 2022. Chemotaxis  
155 of the Human Pathogen *Pseudomonas aeruginosa* to the Neurotransmitter Acetylcholine. *MBio* 13.

156

157
